# Supplementary material for: TEMPO-catalyzed synthesis of 5-substituted isoxazoles from propargylic ketones and TMSN3
Source: Royal Society of Chemistry journal article supplement (doi:10.1039/c6ra11099a), 2016-01-01

## Supporting Information

### TEMPO-catalyzed Synthesis of 5-Substituted Isoxazoles from Propargylic Ketones and TMSN<sub>3</sub>

Yan He,<sup>+a</sup> Yu-yang Xie,<sup>+a</sup> Ying-chun Wang,<sup>ab</sup> Xiao-min Bin,<sup>a</sup> Da-chao Hu,<sup>a</sup> Heng-Shan Wang\*<sup>a</sup> and Ying-Ming Pan\*<sup>a</sup>

<sup>a</sup> State Key Laboratory for Chemistry and Molecular Engineering of Medicinal Resources, School of Chemistry and Pharmaceutical Sciences of Guangxi Normal University, Guilin 541004, People's Republic of China. E-mail: whengshan@163.com, panym2013@hotmail.com

<sup>b</sup> College of Chemistry and Chemical Engineering, Jishou University, Jishou 416000, People's Republic of China

|           |                                                                     |
|-----------|---------------------------------------------------------------------|
| <b>S1</b> | <b>General remarks</b>                                              |
| <b>S2</b> | <b>General preparation of propargylic ketones substrates</b>        |
| <b>S4</b> | <b>Labeling experiments</b>                                         |
| <b>S7</b> | <b>ESI/MS experiments</b>                                           |
| <b>S8</b> | <b><sup>1</sup>H NMR and <sup>13</sup>C NMR spectra of products</b> |

---

\*Correspondence authors

Phone: (+86)-773-5846279; fax: (+86)-773-5803930;

E-mail: whengshan@163.com; panym2013@hotmail.com

## General remarks

Melting points were measured with a SGW X-4 melting point instrument (uncorrected). Proton nuclear magnetic resonance spectra ( $^1\text{H}$  NMR) and carbon nuclear magnetic resonance spectra ( $^{13}\text{C}$  NMR) were recorded at 400 MHz and 100 MHz, respectively, using  $\text{CDCl}_3$  as reference standard ( $\delta$  7.26 ppm) for  $^1\text{H}$  NMR and ( $\delta$  77 ppm) for  $^{13}\text{C}$  NMR. HRMS (ion trap) were recorded using ESI. Precoated silica gel plates GF-254 were used for thin-layer analytical chromatography. Column chromatography was performed on silica gel (300-400 mesh). Starting materials azidomethyl aromatics were readily prepared according to literature procedures. Unless otherwise noted, all reagents were obtained commercially and used without further purification.

## General preparation of propargylic ketones substrates

The following synthesis procedure is the general procedure used to prepare all substrates.

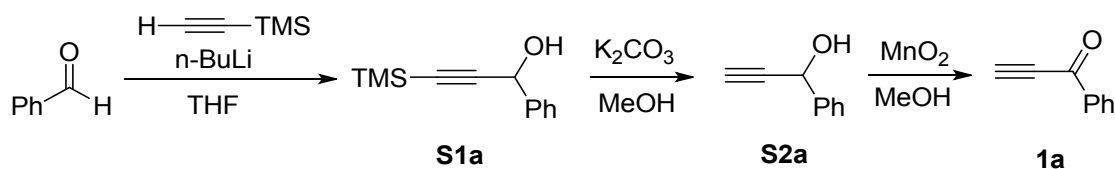

Under an Ar atmosphere, to a solution of trimethylsilylacetylene (1.5 mL, 10.00 mmol) in THF (20.0 mL) were added dropwise *n*-BuLi (9.38 mL, 1.6 M in hexane) at  $-78$  °C, and the mixture was stirred for 30 min at the same temperature. To the above reaction mixture was added benzaldehyde (1.02 ml, 10.00 mmol) at  $-78$  °C, and the mixture was stirred with slowly warming to room temperature. After stirring for 2 h at the same temperature, the reaction was quenched with sat.  $\text{NH}_4\text{Cl}$  aq., and the mixture was extracted with  $\text{CH}_2\text{Cl}_2$ , dried over  $\text{MgSO}_4$ , filtered, and concentrated in vacuo. The resulting oil was purified by column chromatography on silica gel ( $\text{CH}_2\text{Cl}_2$ : hexane = 4:1) to afford 1-phenyl-3-trimethylsilanylprop-2-yn-1-ol (**S1a**) (2.01 g, 9.82 mmol) as colorless oil.

To a solution of **S1a** (2.01 g, 9.82 mmol) in MeOH (20.0 mL) were added  $\text{K}_2\text{CO}_3$  (1.38 g, 10.00 mmol) at room temperature, and the mixture was stirred for 2 h at the same temperature, and monitored periodically by TLC. Upon completion, the reaction mixture was diluted with water (30 mL) and extracted with ethyl acetate ( $3 \times 30$  mL). The combined organic layers were washed with water and brine, dried over  $\text{Na}_2\text{SO}_4$  and filtered. The solvent was removed under vacuum. The crude residue was purified by flash silica gel column chromatography (ethyl acetate/petroleum ether = 1:20 to 1:10) to afford propargyl alcohols **S2a** (1.30 g, 9.8mmol).

The crude alcohol was dissolved in dichloromethane and treated with  $\text{MnO}_2$  (15 equiv.). After stirring at room temperature for 2h, the reaction was complete as

determined by TLC. Excess  $\text{MnO}_2$  was removed by filtration of the reaction mixture through a pad of celite. The filtrate was washed sequentially with water and brine and dried over  $\text{MgSO}_4$ . The solvent was removed under reduced pressure to afford a yellow residue that was purified by flash column chromatography. The crude residue was purified by flash silica gel column chromatography (ethyl acetate/petroleum ether = 1:20 to 1:10) to afford propargylic ketones **1a** (1.04 g, 8.00mmol).

Propargylic ketones (**1a**)  $^1\text{H}$  NMR (400 MHz,  $\text{CD}_3\text{CN}$ ):  $\delta$  8.15–8.09 (m, 2H), 7.69 (t,  $J = 7.4$  Hz, 1H), 7.55 (t,  $J = 7.7$  Hz, 2H), 3.02 (s, 1H).

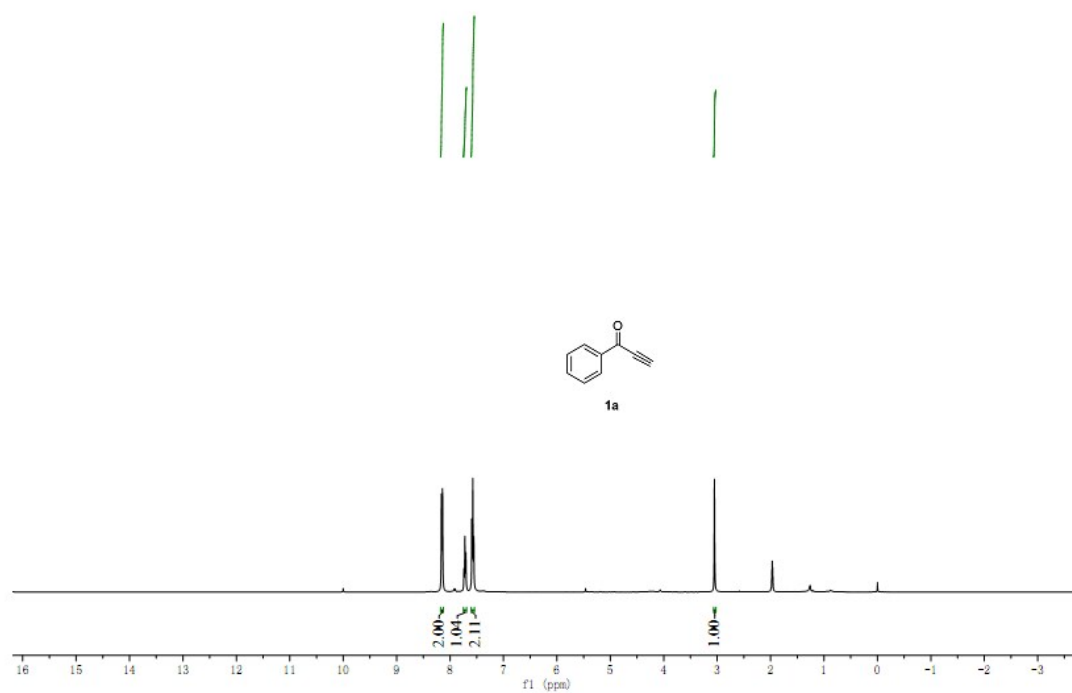

## Labeling experiments:

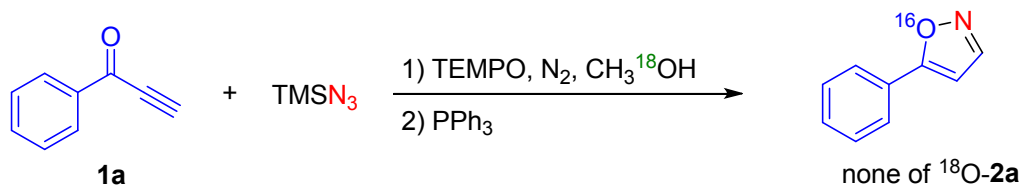

Reaction conditions: **1a** (0.3 mmol),  $\text{TMSN}_3$  (0.45 mmol), TEMPO (15 mol%) in  $\text{CH}_3^{18}\text{OH}$  (2 mL) under argon atmosphere at room temperature.  $\text{PPh}_3$  (1.0 equiv.) was added after 12 h and the mixture was stirred for another 1 h. The  $^{18}\text{O}$ -**2a** was determined by HRMS.

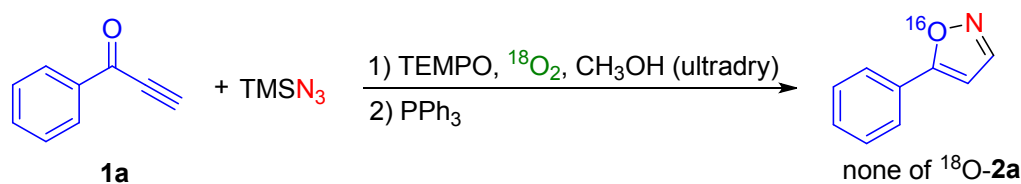

Reaction conditions: **1a** (0.3 mmol),  $\text{TMSN}_3$  (0.45 mmol), TEMPO (15 mol%) in  $\text{CH}_3\text{OH}$  (2 mL) under  $^{18}\text{O}_2$  atmosphere at room temperature.  $\text{PPh}_3$  (1.0 equiv.) was added after 12 h and the mixture was stirred for another 1 h. The  $^{18}\text{O}$ -**2a** was determined by HRMS.

## HRMS analysis of **2a**

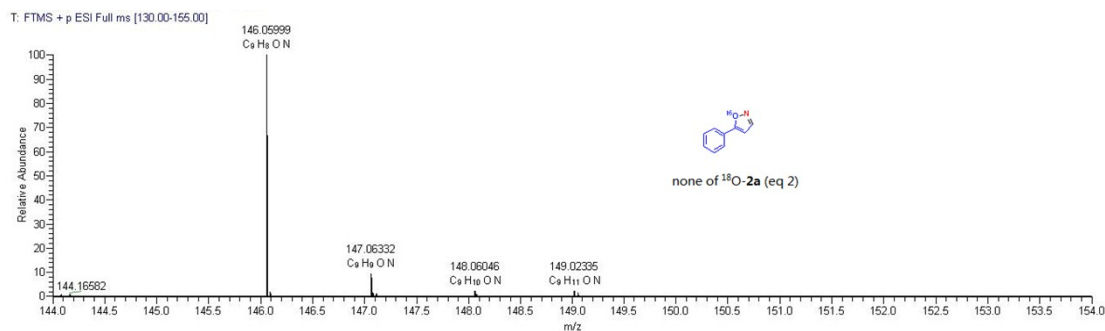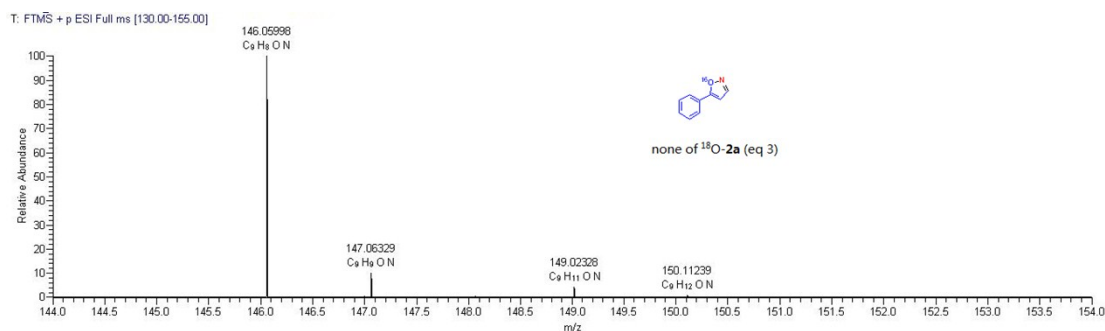

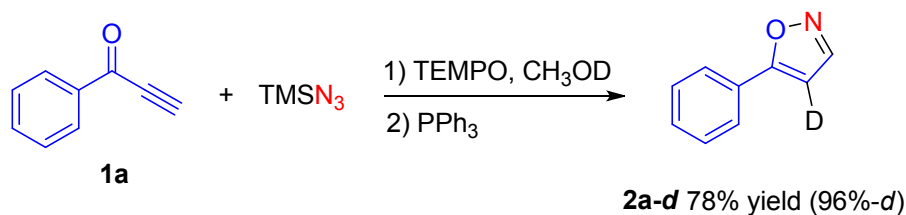

Reaction conditions: **1a** (0.3 mmol),  $\text{TMSN}_3$  (0.45 mmol), TEMPO (15 mol%) in  $\text{CH}_3\text{OD}$  (2 mL) under  $^{18}\text{O}_2$  atmosphere at room temperature.  $\text{PPh}_3$  (1.0 equiv.) was added after 12 h and the mixture was stirred for another 1 h. The **2a-d** was determined by  $^1\text{H}$  NMR.

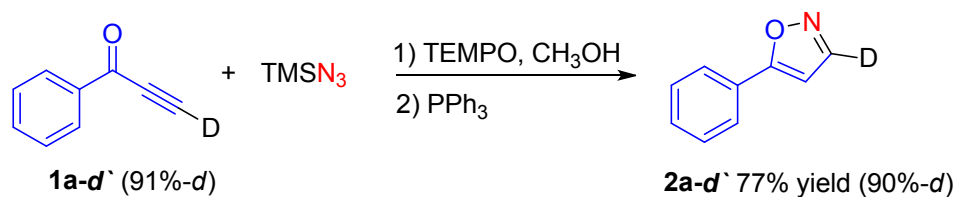

Reaction conditions: **1a-d'** (0.3 mmol),  $\text{TMSN}_3$  (0.45 mmol), TEMPO (15 mol%) in  $\text{CH}_3\text{OH}$  (2 mL) under air atmosphere at room temperature.  $\text{PPh}_3$  (1.0 equiv.) was added after 12 h and the mixture was stirred for another 1 h. The **2a-d'** was determined by  $^1\text{H}$  NMR.

### Spectral data of **2a-d** and **2a-d'**

**2a-d**  $^1\text{H}$  NMR (400 MHz,  $\text{CDCl}_3$ )  $\delta$  8.29 (s, 1H), 7.83–7.76 (m, 2H), 7.51–7.41 (m, 3H) ppm.

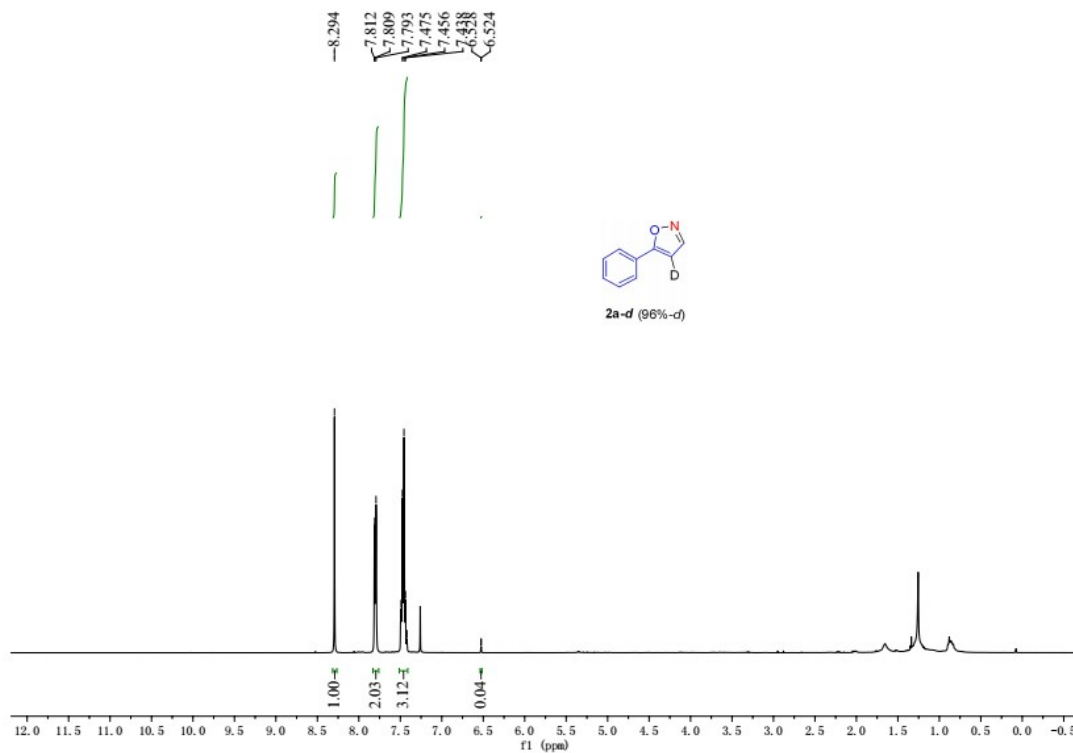

**2a-d'**  $^1\text{H}$  NMR (400 MHz,  $\text{CDCl}_3$ )  $\delta$  7.81 (dd,  $J = 7.9, 1.6$  Hz, 2H), 7.47 (d,  $J = 7.7$  Hz, 3H), 6.53 (s, 1H)

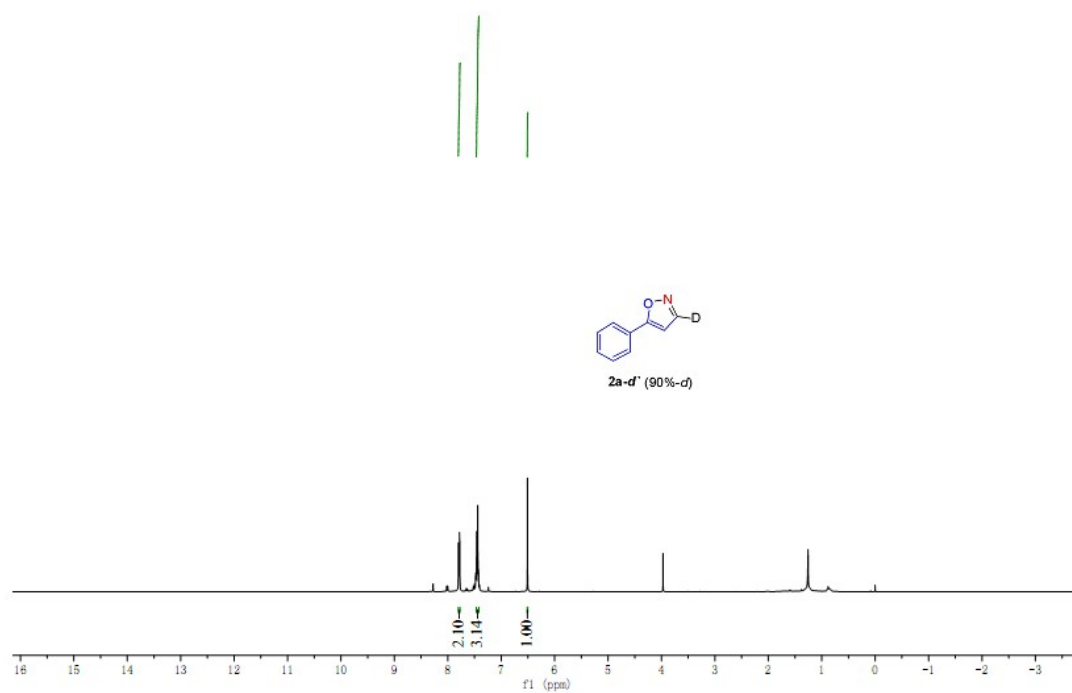

## ESI/MS experiments:

**1** (0.3 mmol), TMSN<sub>3</sub> (0.45 mmol), TEMPO (15 mol%) in CH<sub>3</sub>OH (2 mL) under air at room temperature. PPh<sub>3</sub> (1.0 equiv.) was added after 12 h and the mixture was stirred for another 1 h and 50 μL of the mixture was used for the ESI analysis in CH<sub>3</sub>OH.

The species **B** in the reaction mixture was identified by HRMS.

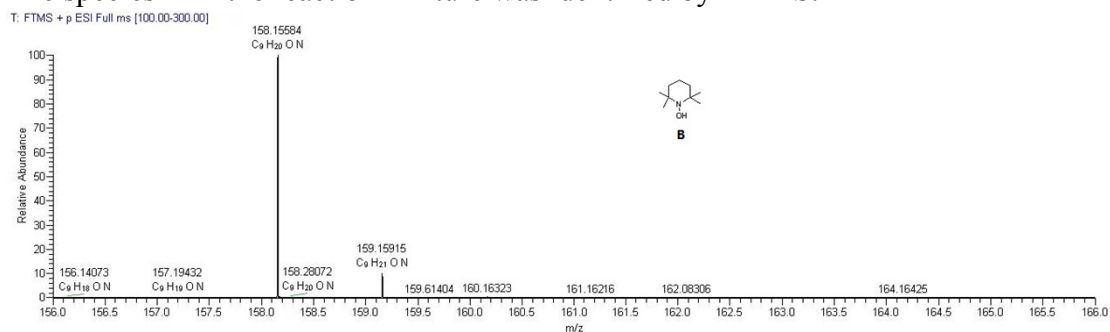

The intermediate **6** in the reaction mixture was identified by HRMS.

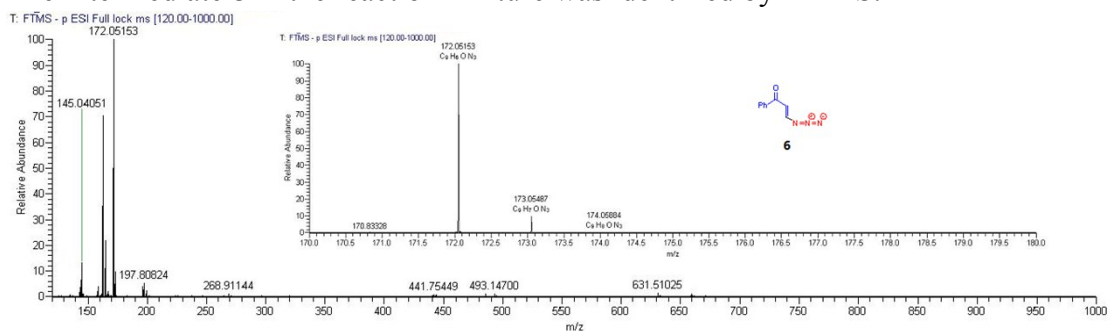



# $^1\text{H}$ NMR and $^{13}\text{C}$ NMR spectra for products

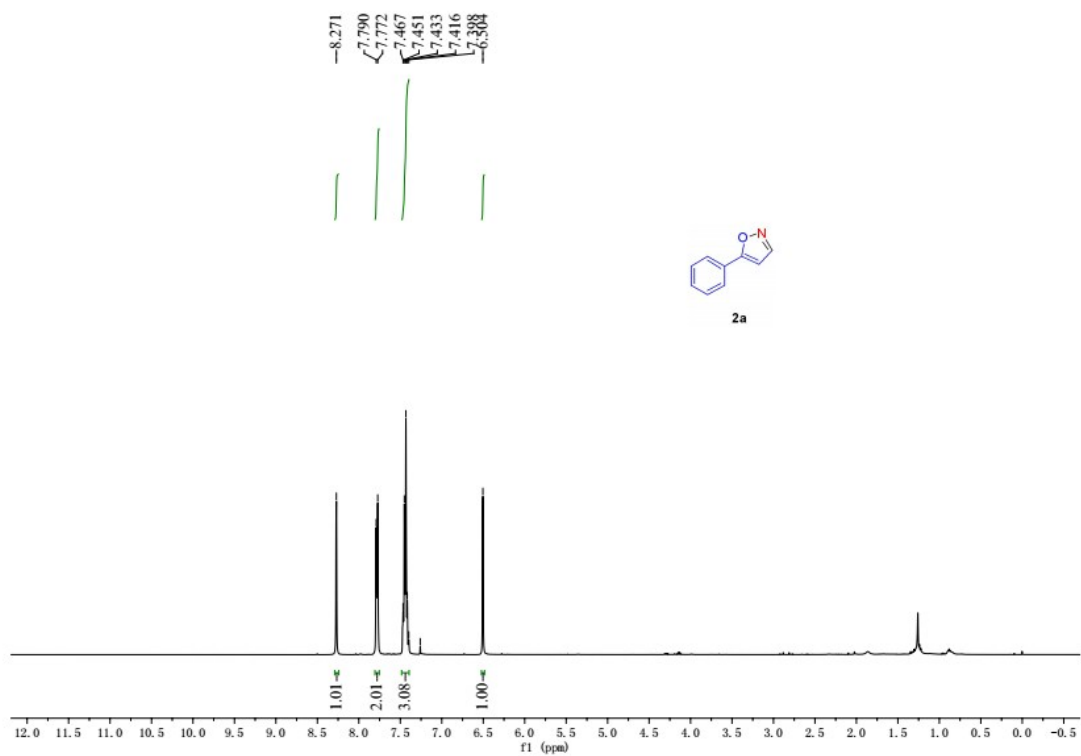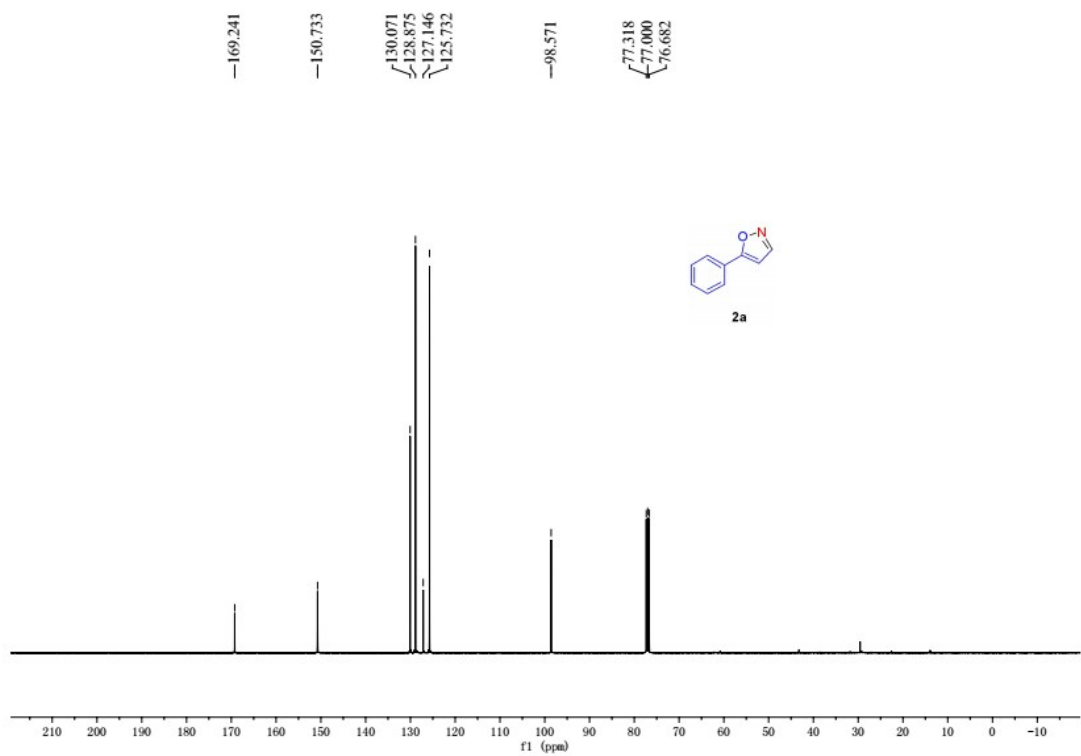

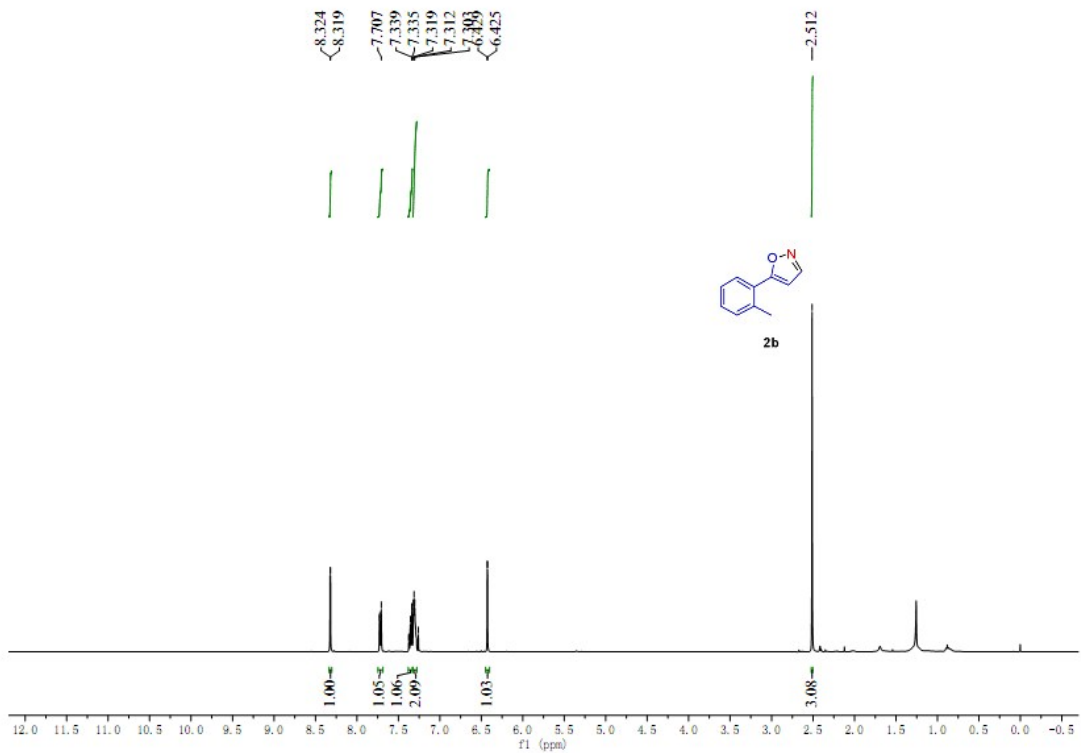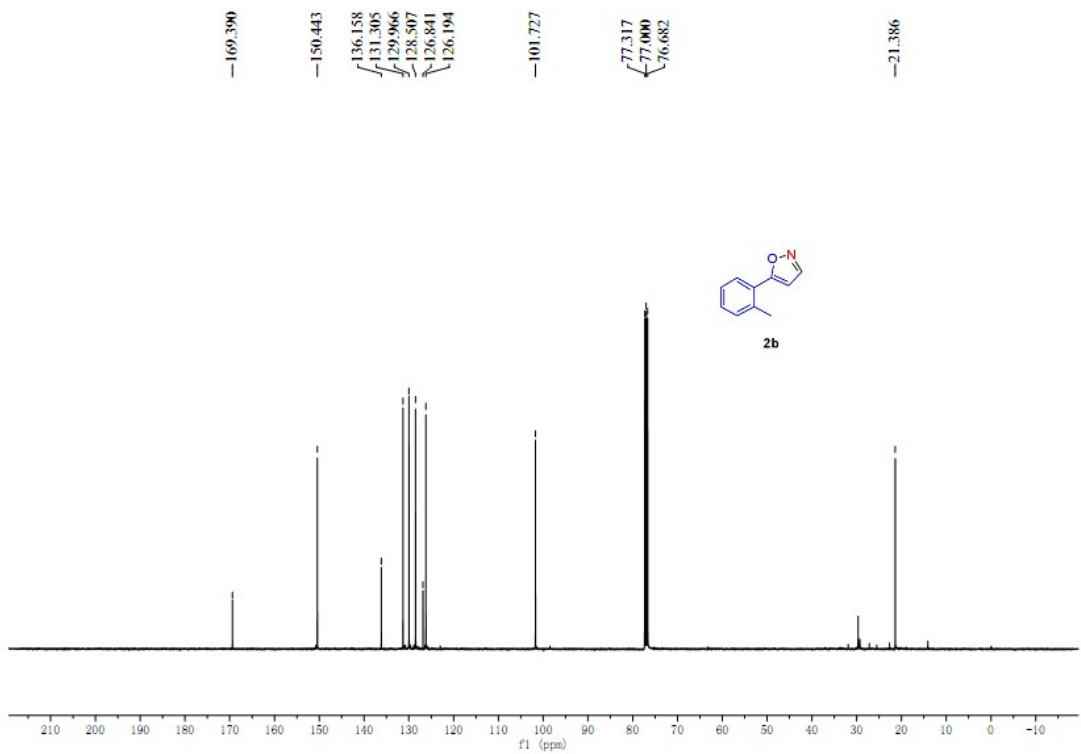

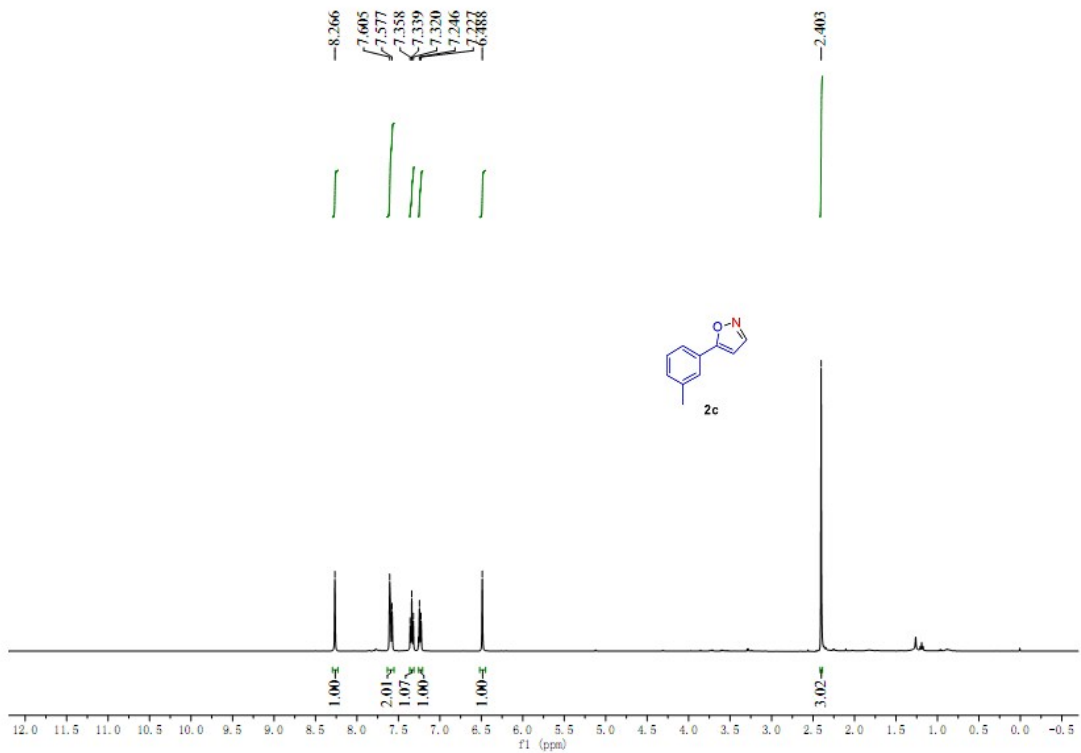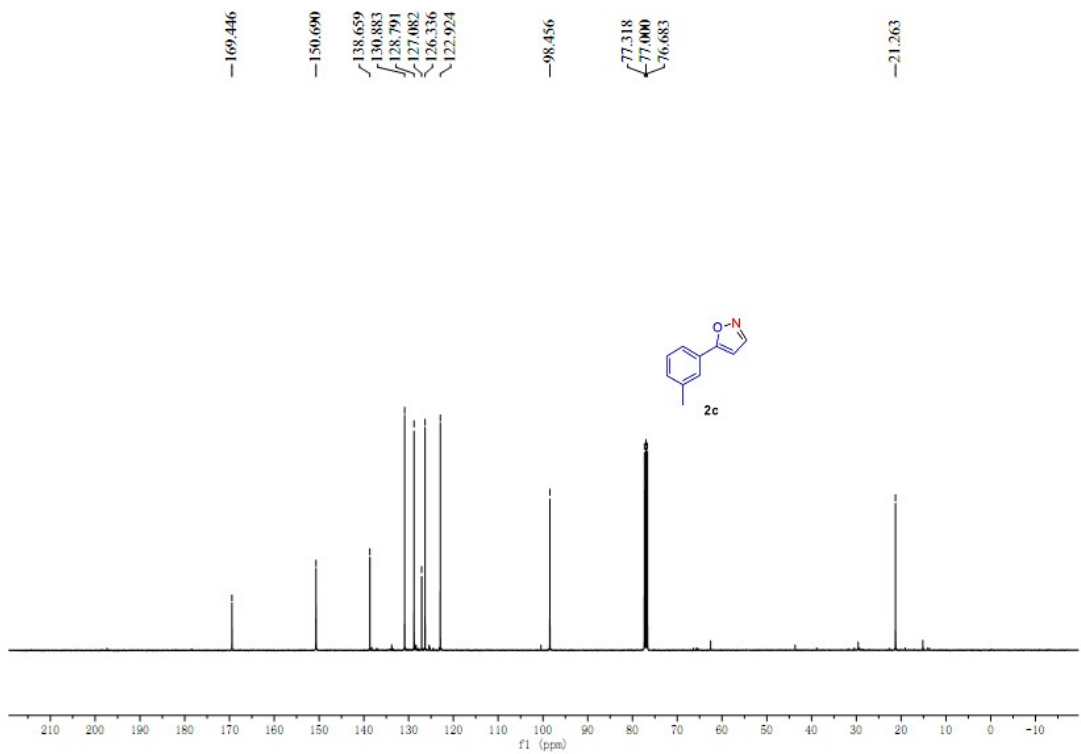

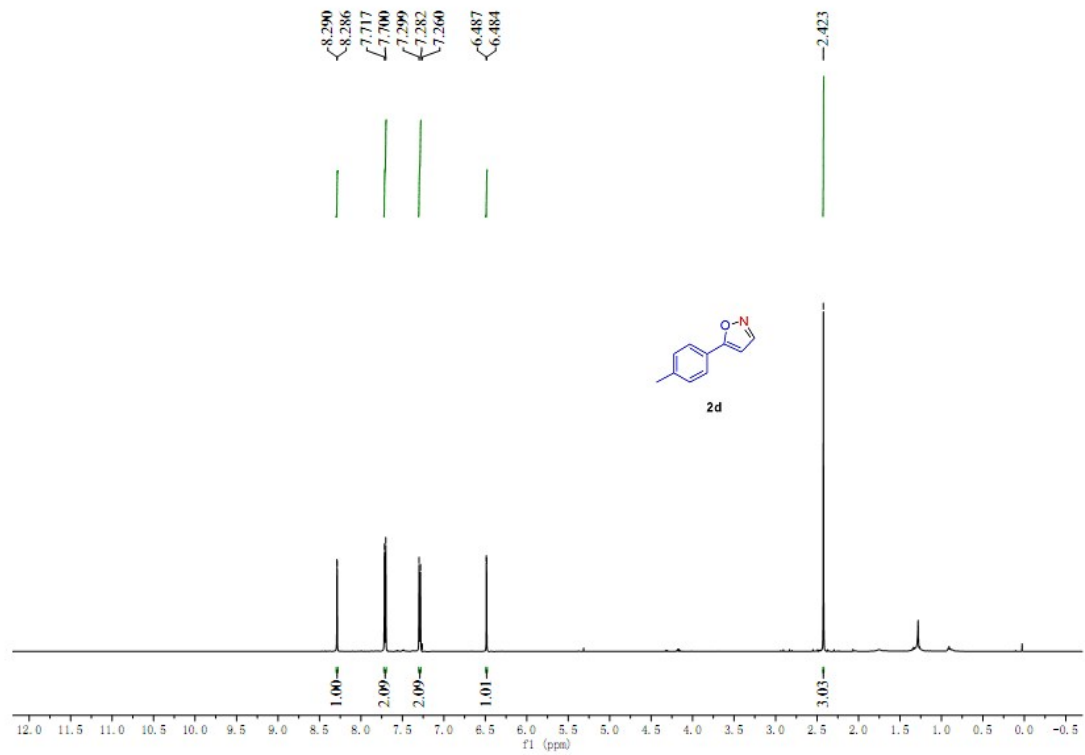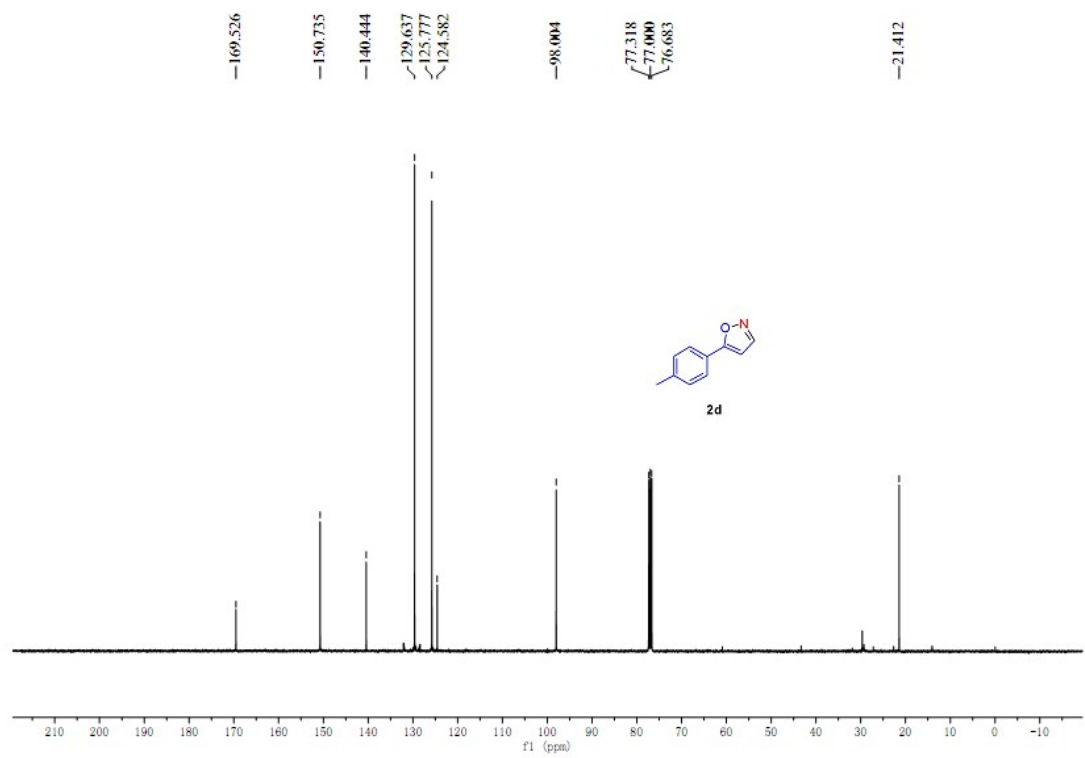

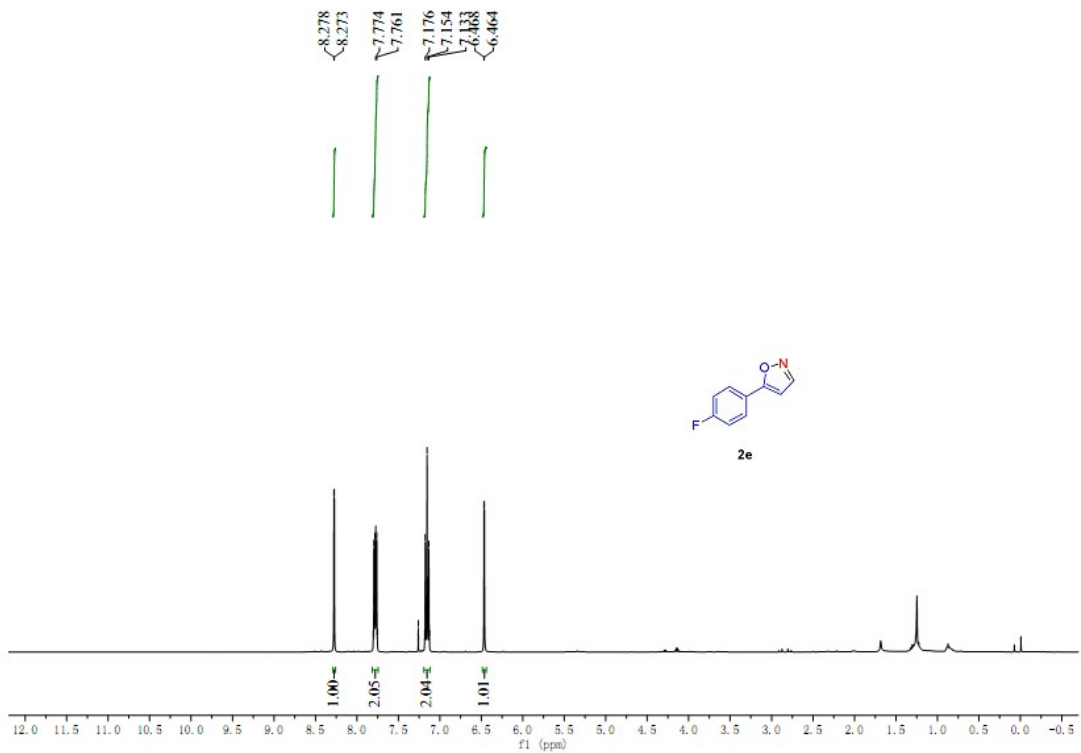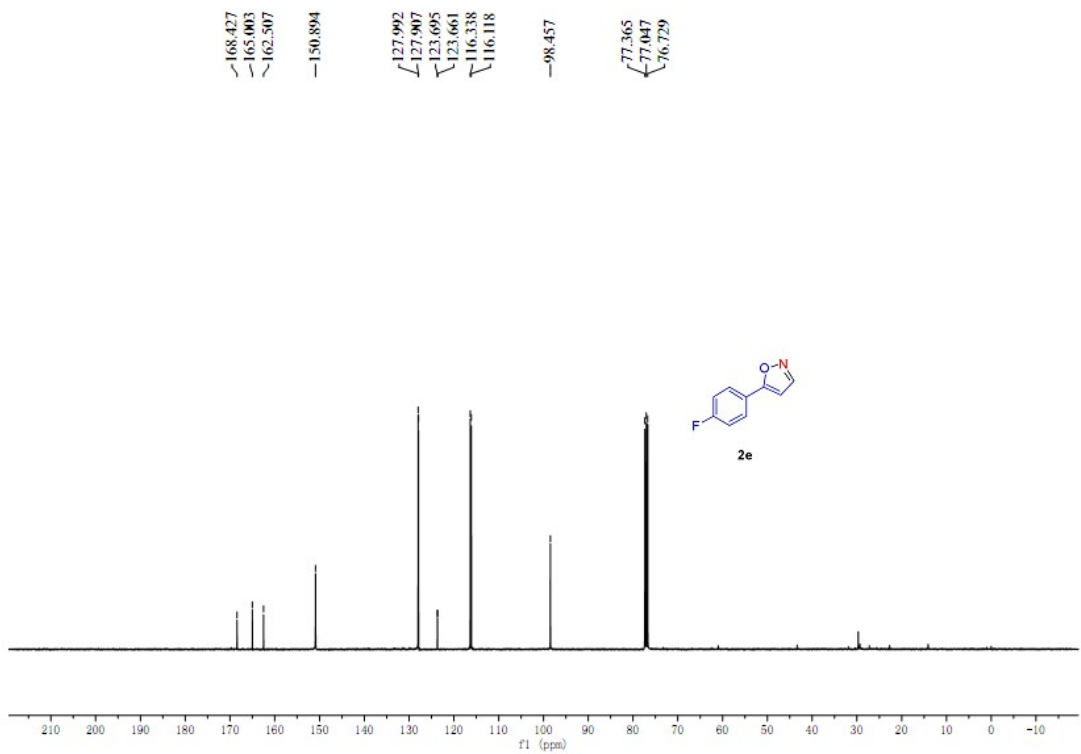

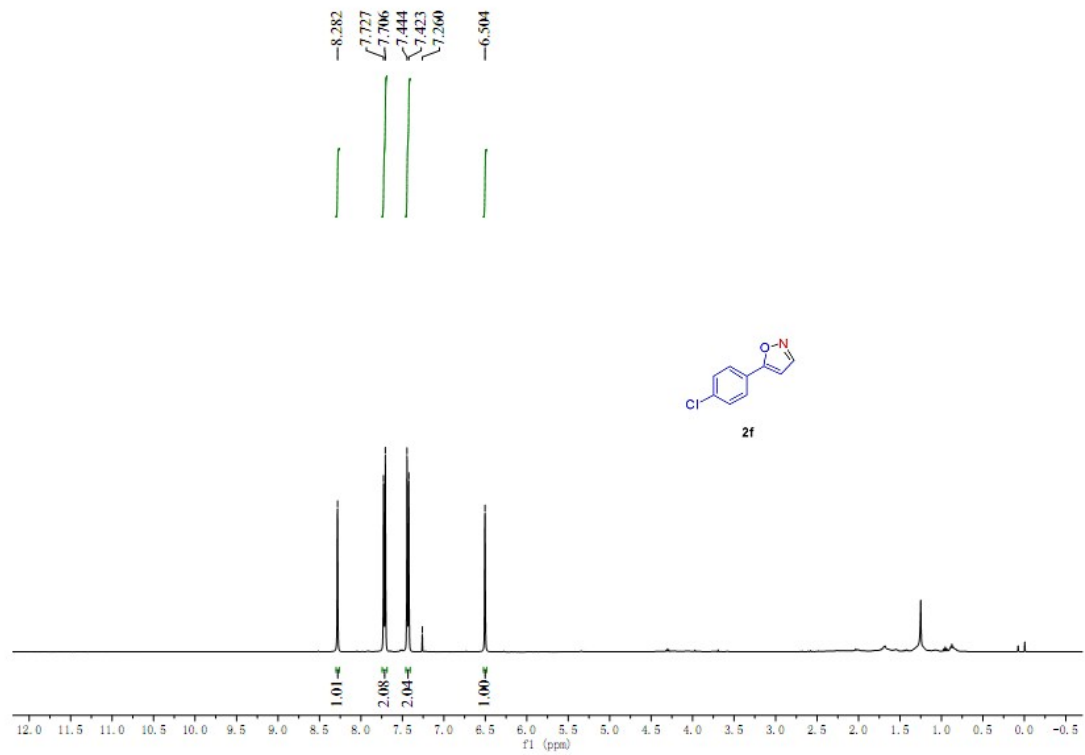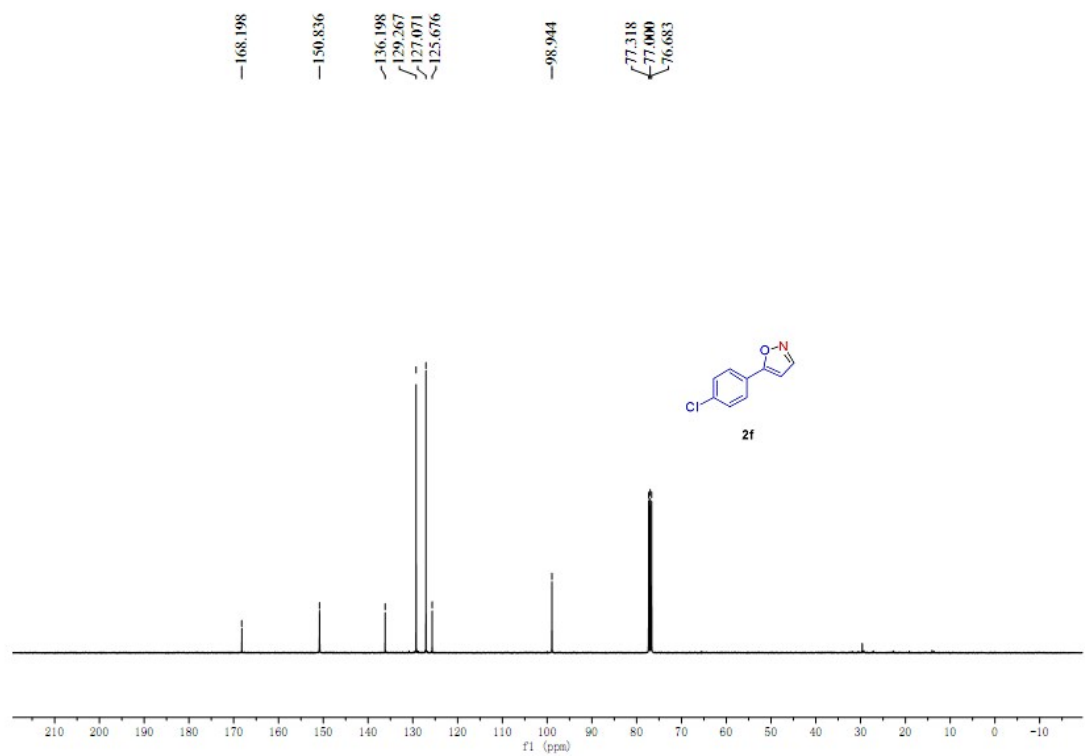

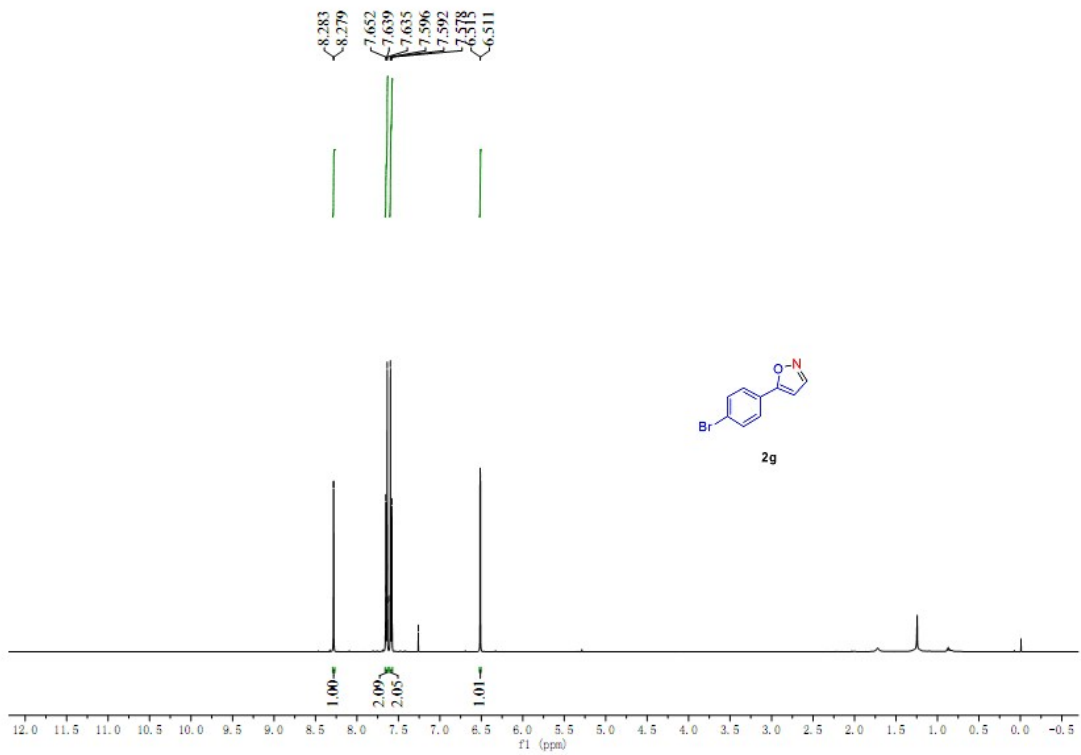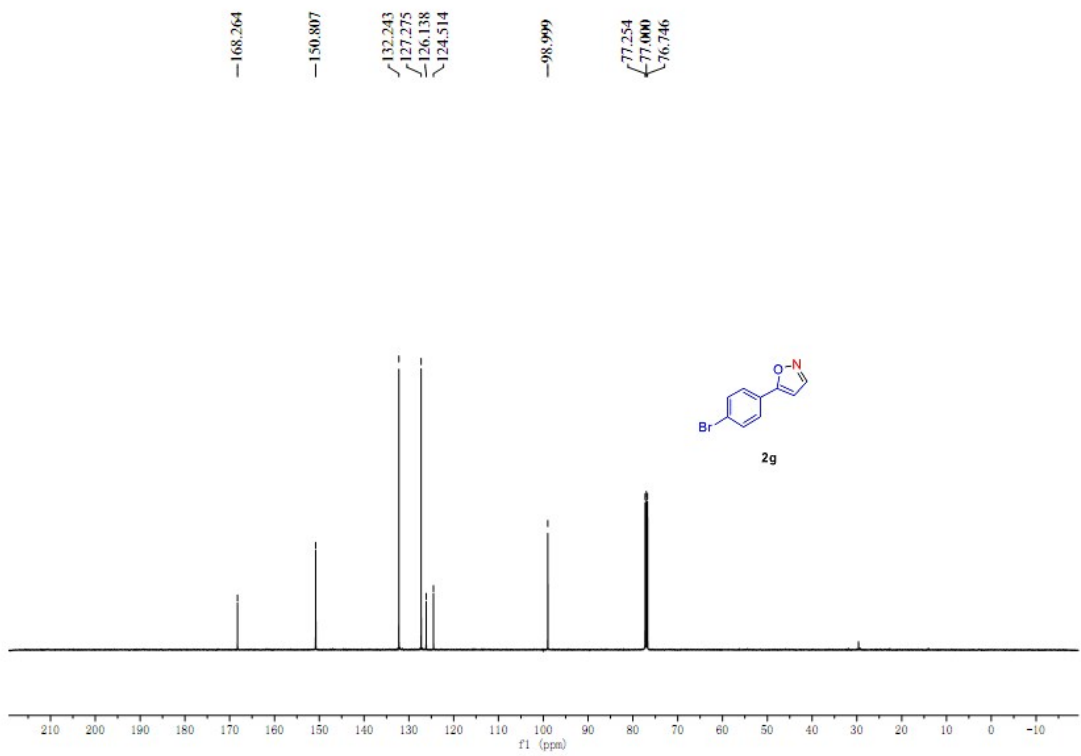

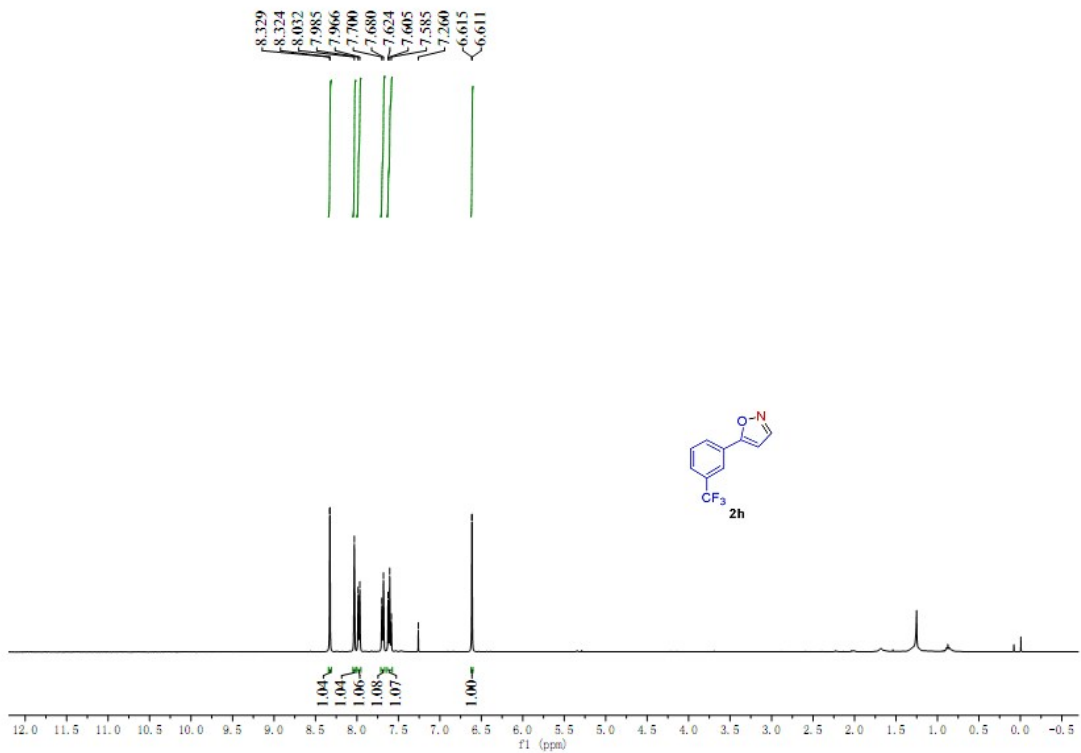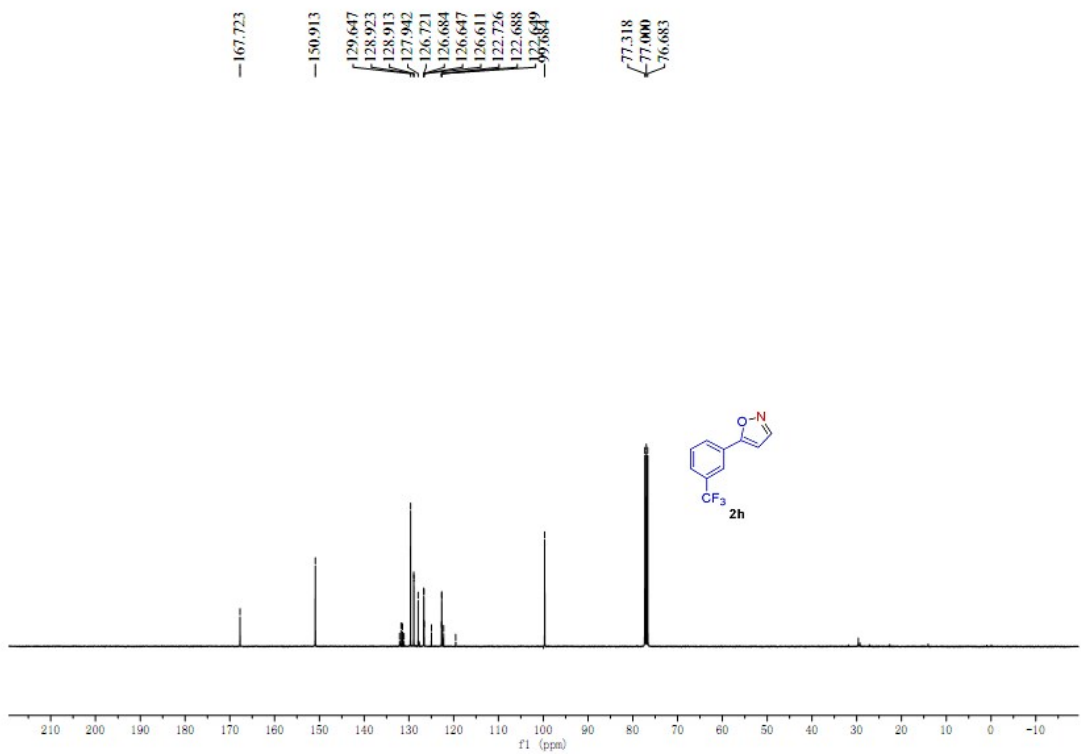



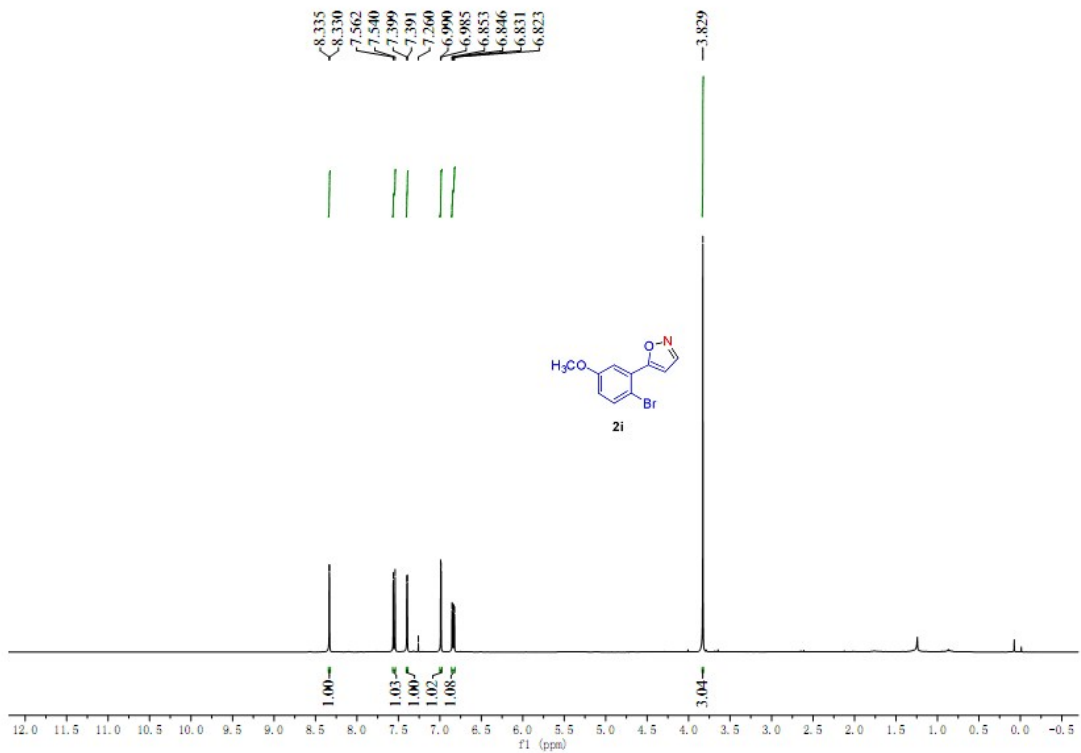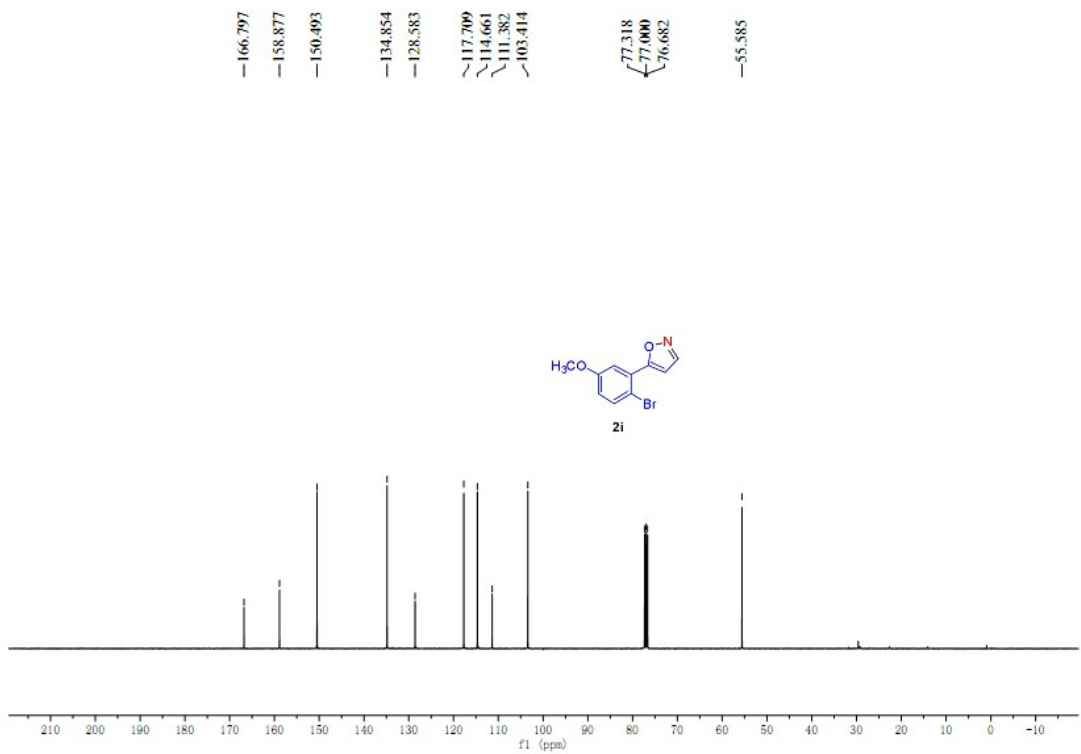

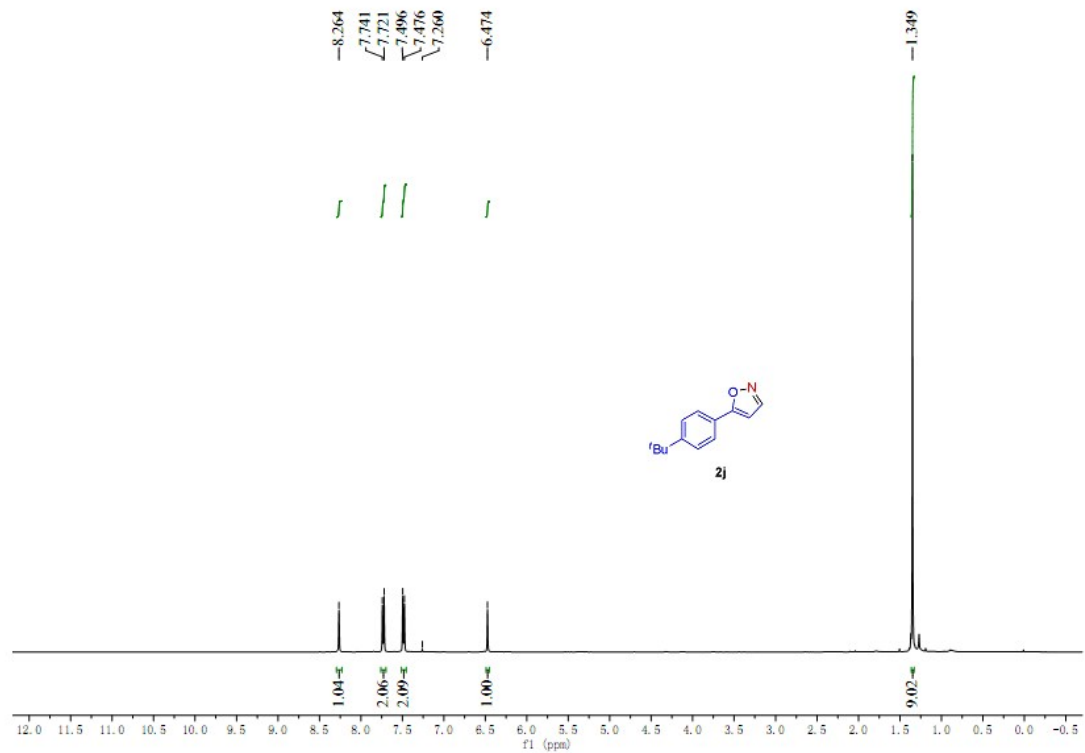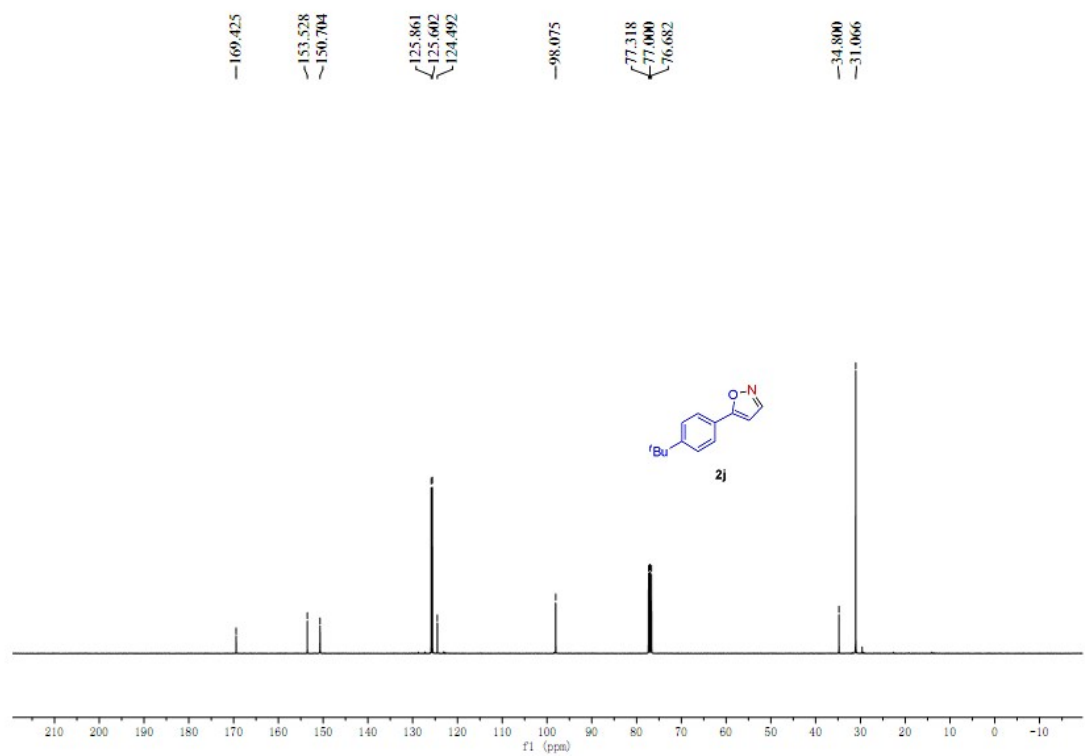

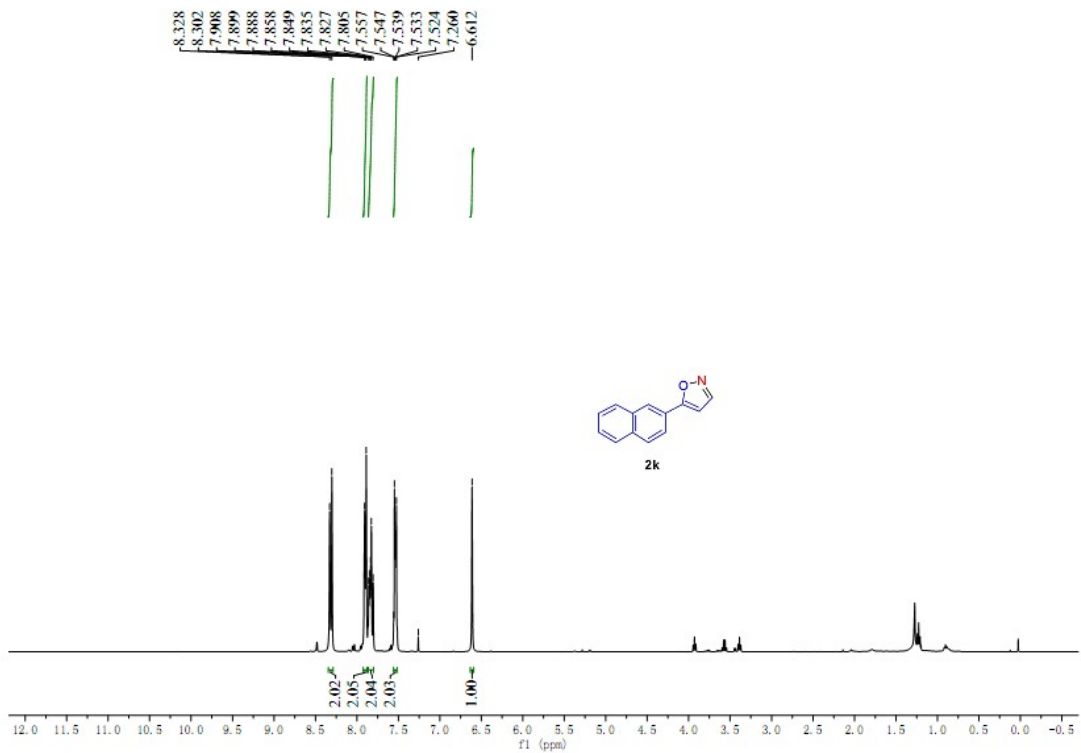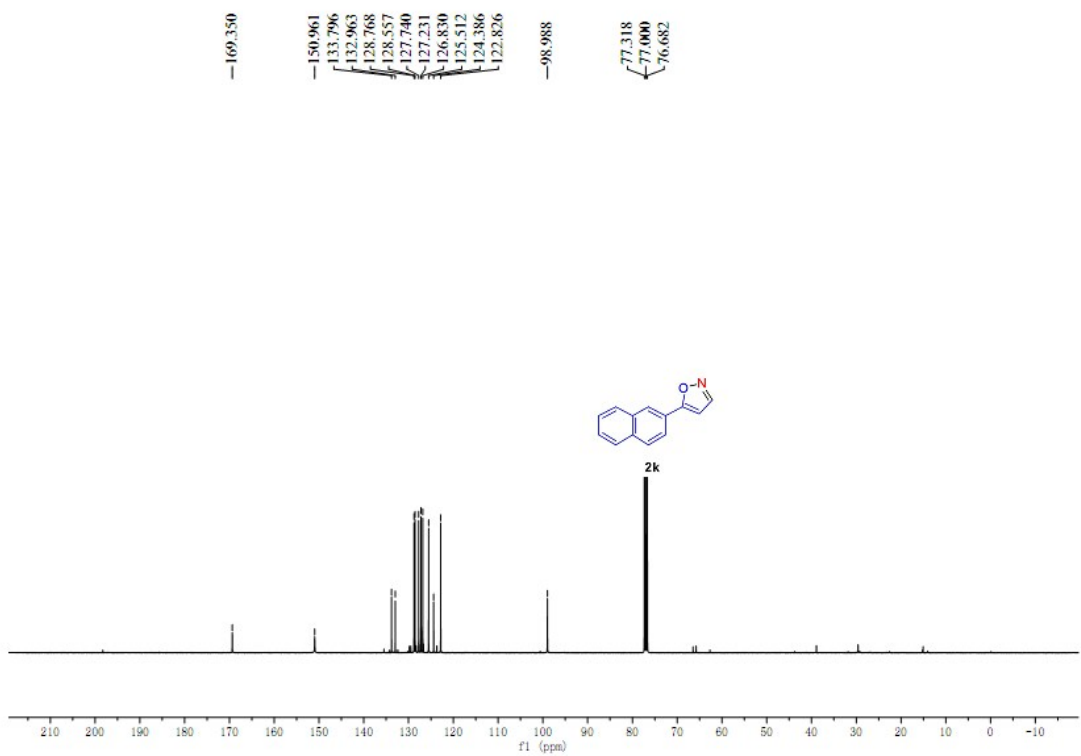

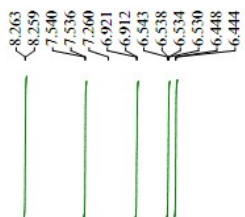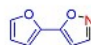

21

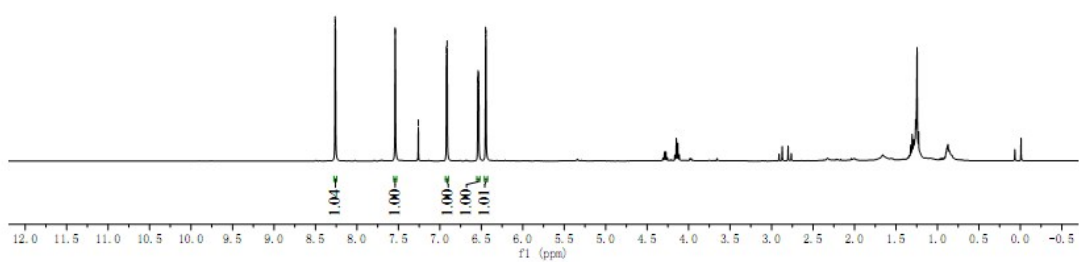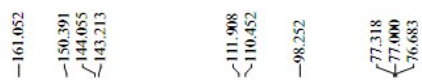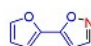

21

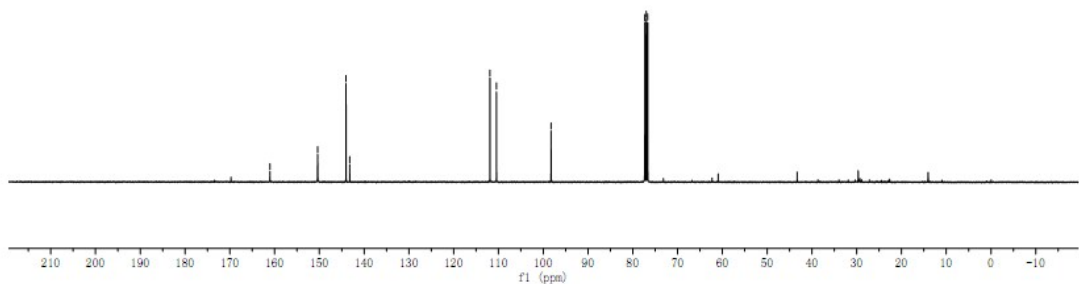

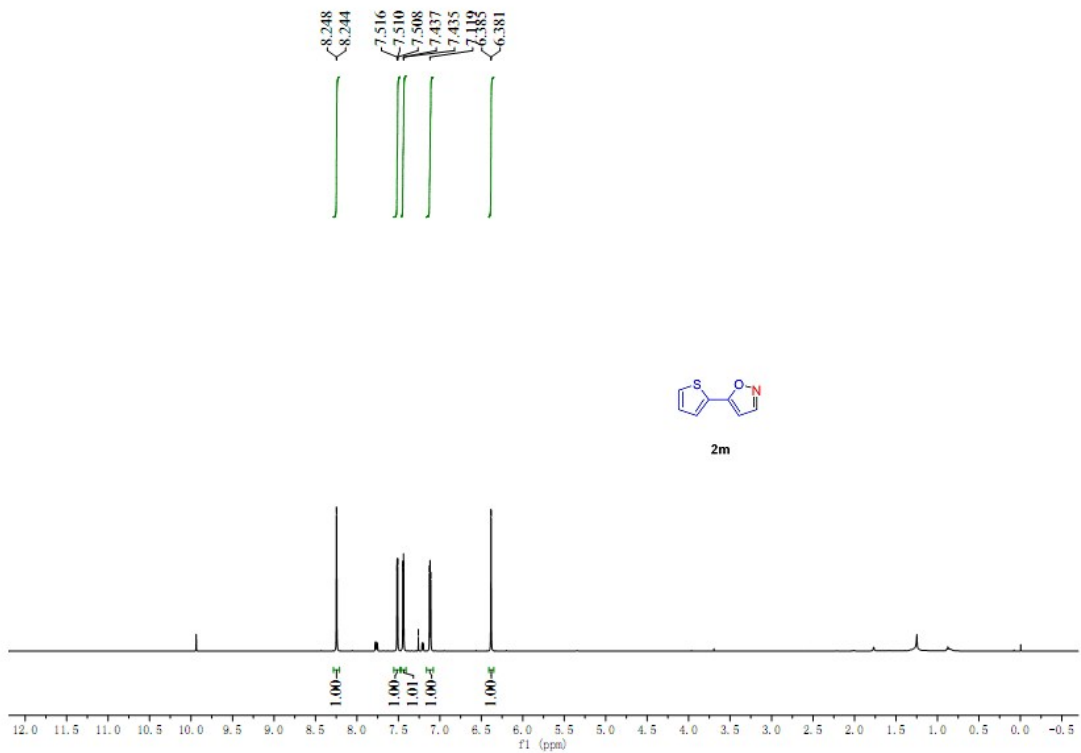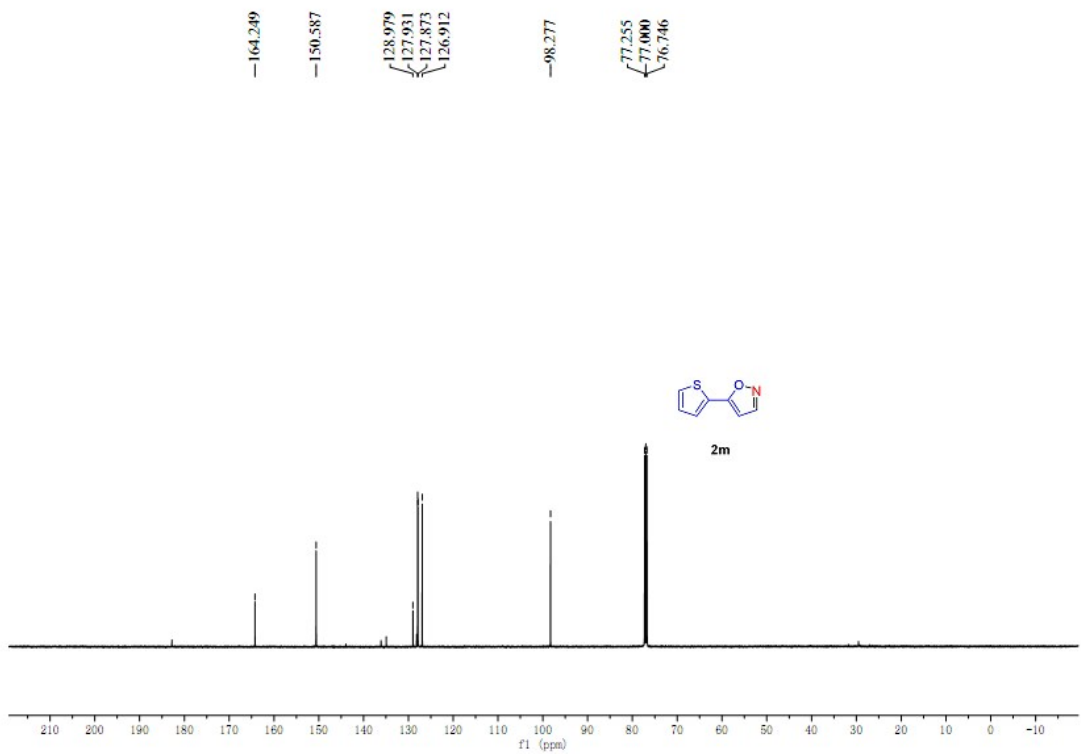

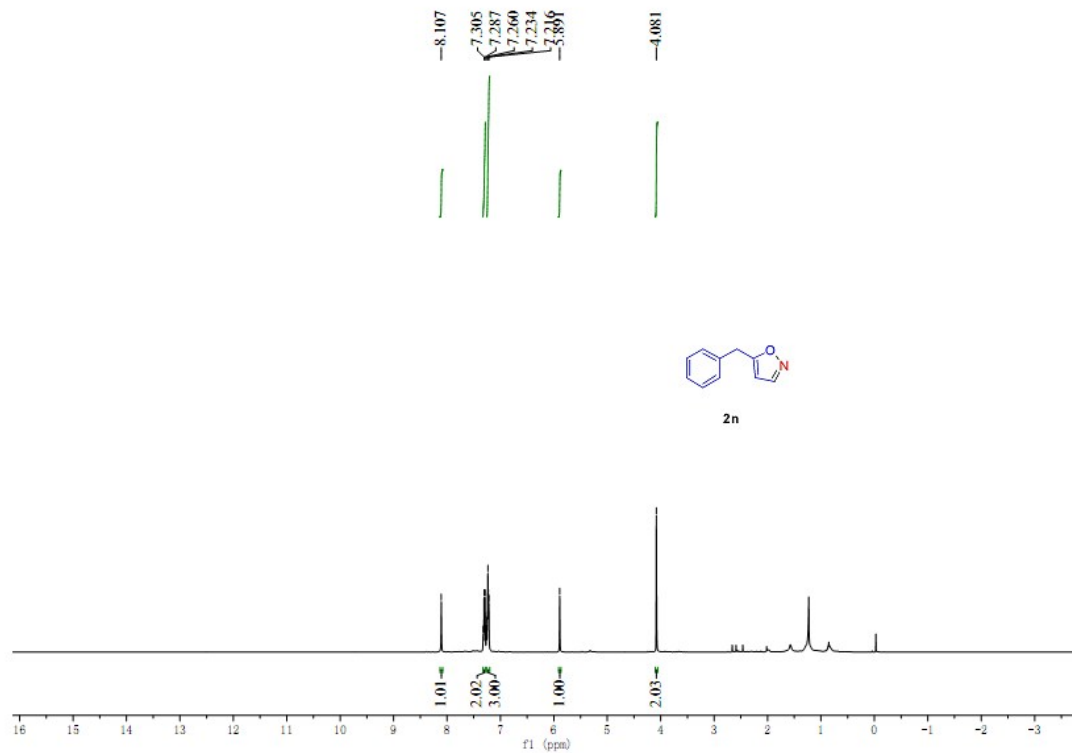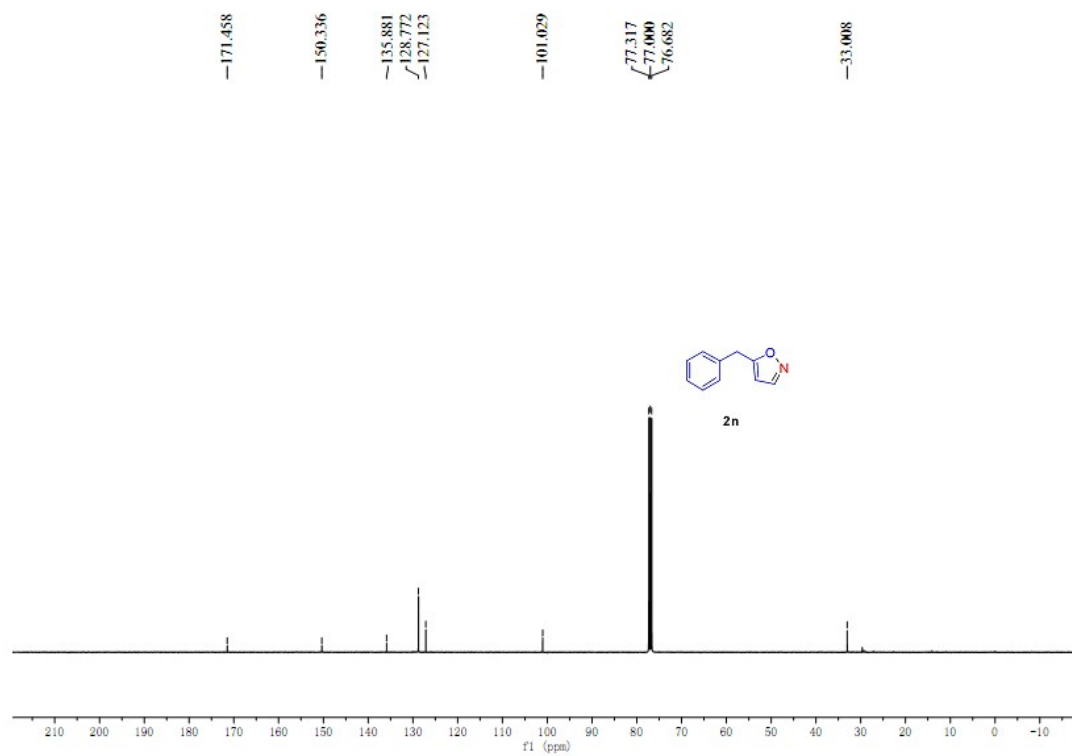

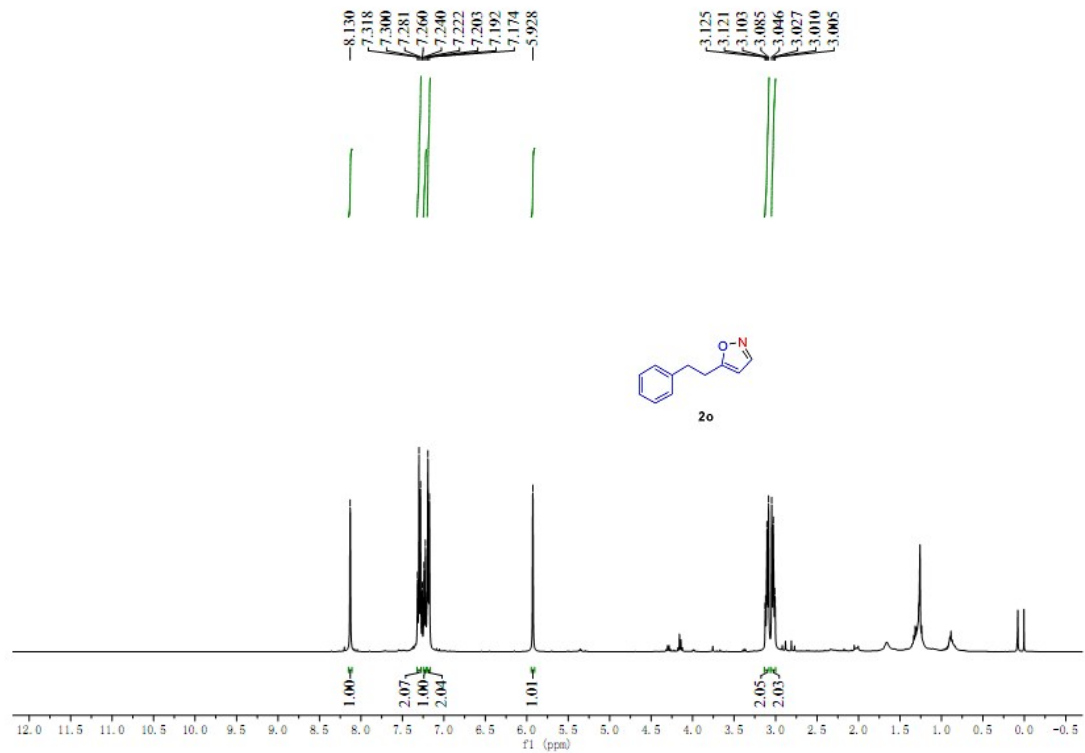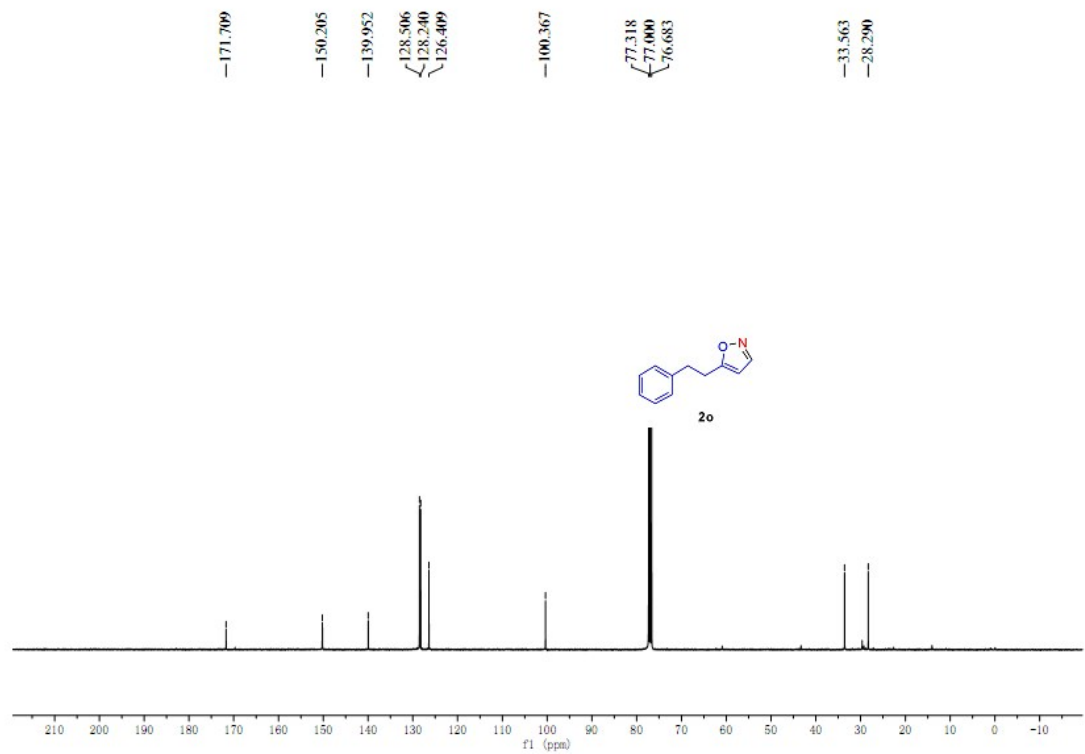

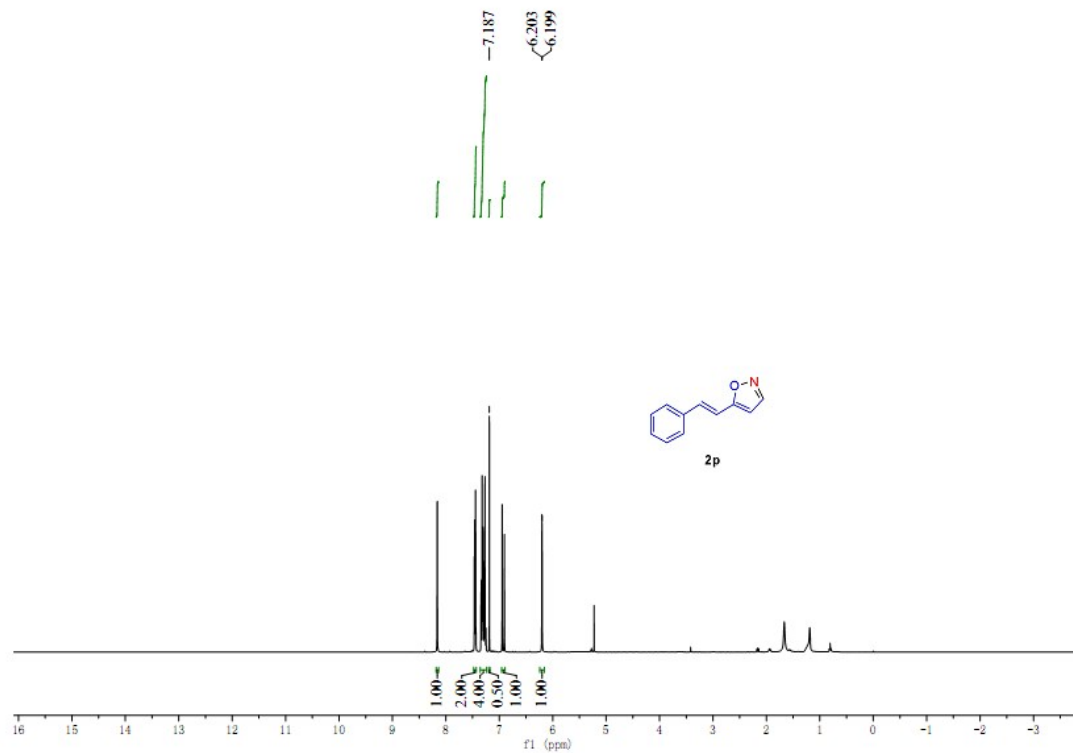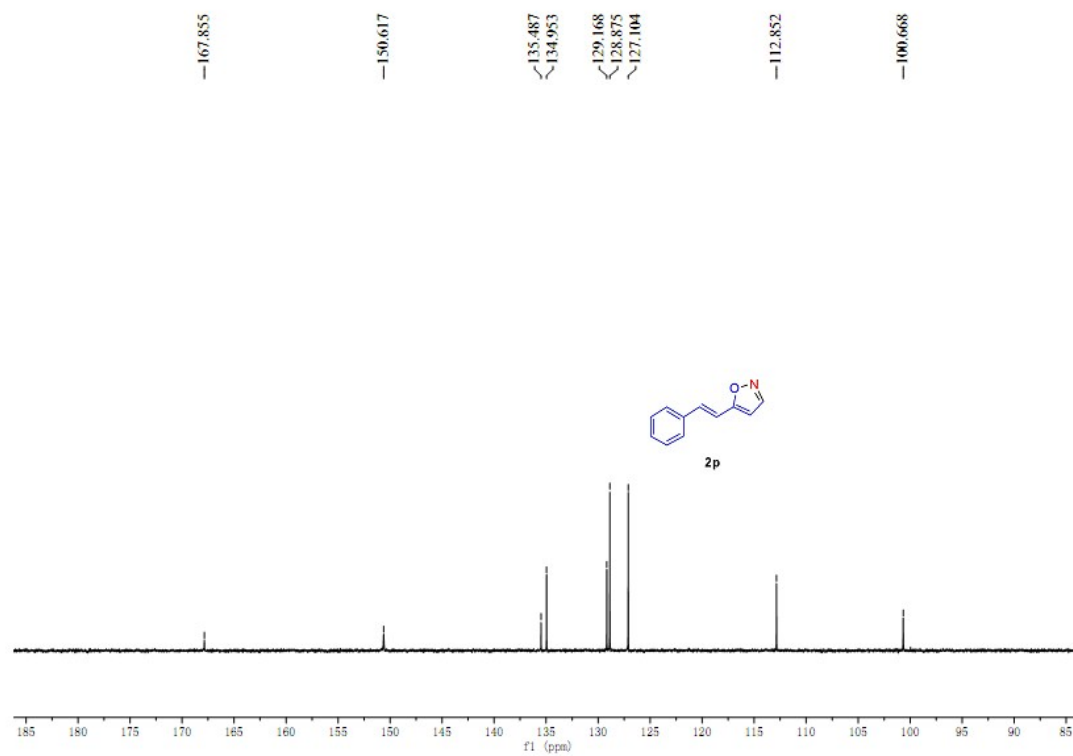



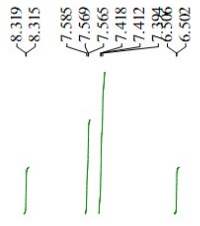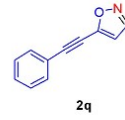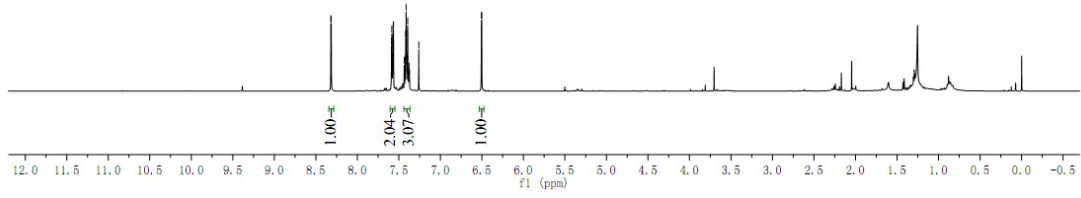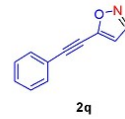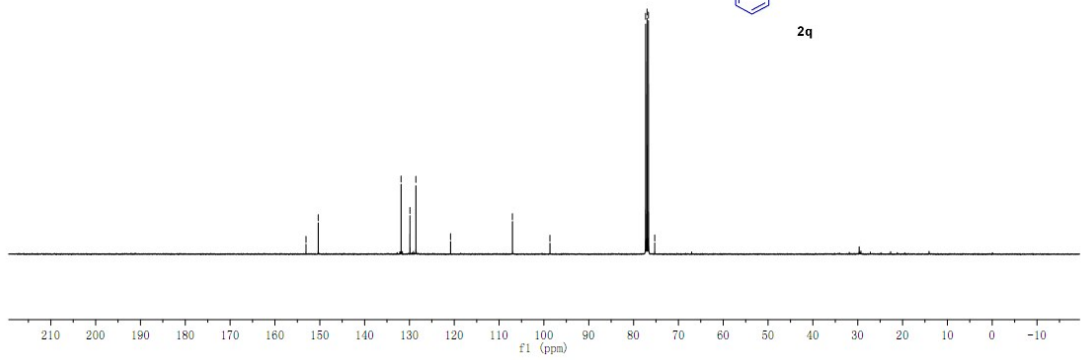

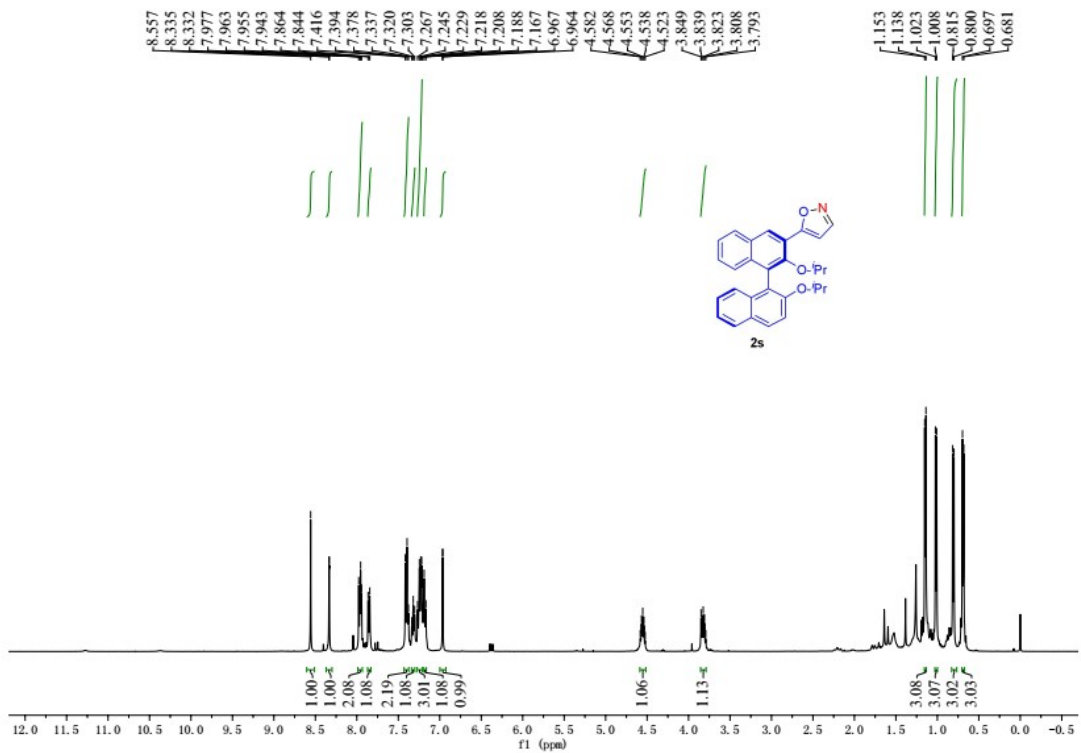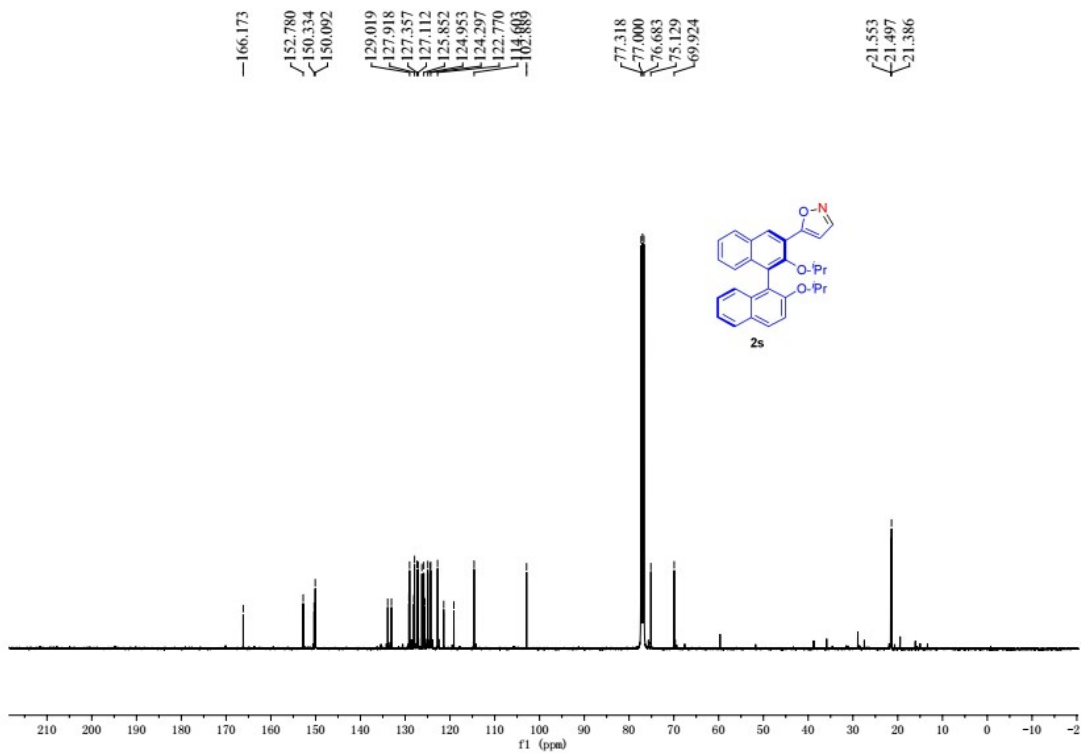

Supplement: c6ra11099a1.pdf [file c6ra11099a1.pdf]
